# Supplementary material for: In Vivo Fate Imaging of Intracerebral Stem Cell Grafts in Mouse Brain
Source: PubMed Central journal article supplement (PMC4671578; doi:10.1371/journal.pone.0144262), 2015-12-07

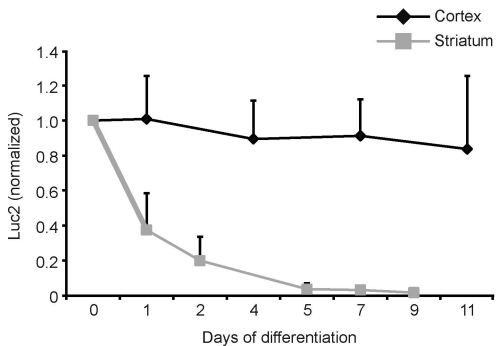

Supplement: pone.0144262.s001.pdf [file pone.0144262.s001.pdf]
